# Supplementary material for: Hydrogel Surface-Modified Polyurethane Copolymer Film with Water Permeation Resistance and Biocompatibility for Implantable Biomedical Devices
Source: MDPI journal article supplement (doi:10.3390/mi12040447), 2021-04-16
Supplement: s1 [file s1]

## Supplementary Materials

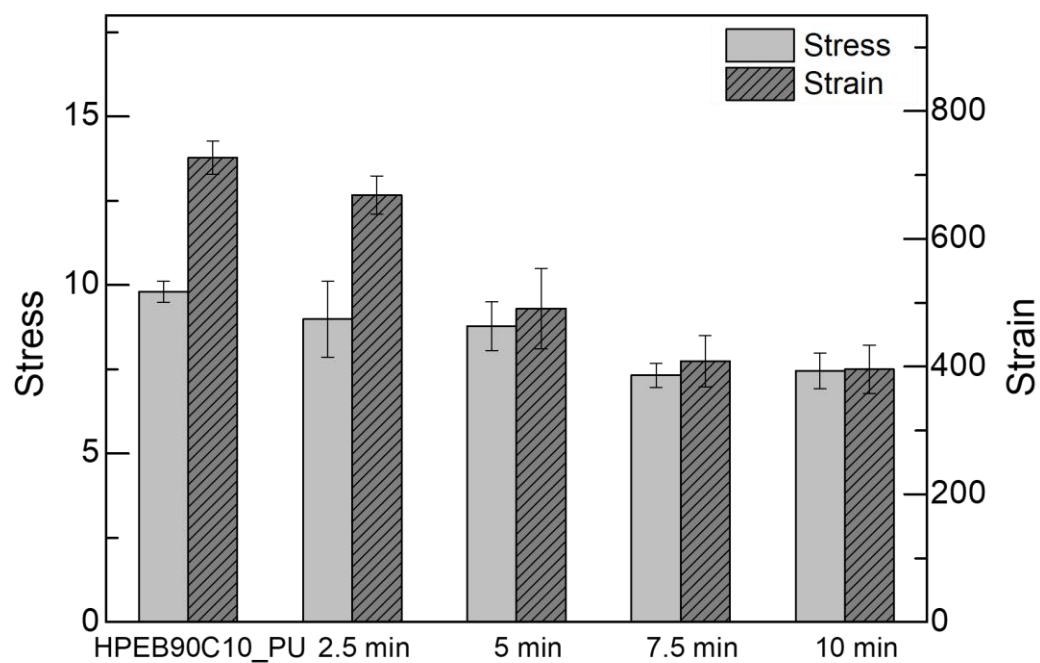

**Figure S1.** Tensile stress-strain value of HPEB90C10 with varying hexane treatment time.
